# Supplementary material
Source: MDPI journal article supplement (https://www.mdpi.com/2076-3263/13/4/97)
Supplement: s1 [file s1]

# Evolution of coastal subarctic lakes in the context of climatic and geological changes and human occupation (north-central Labrador, Canada)

Camille Latourelle-Vigeant <sup>1,\*</sup>, Reinhard Pienitz <sup>1</sup> and Najat Bhiry <sup>1</sup>

<sup>1.</sup> Département de Géographie and Centre d'Études Nordiques, Université Laval, Québec, QC G1V 0A6, Canada

\* Correspondence: [camille.latourelle-vigeant.1@ulaval.ca](mailto:camille.latourelle-vigeant.1@ulaval.ca)

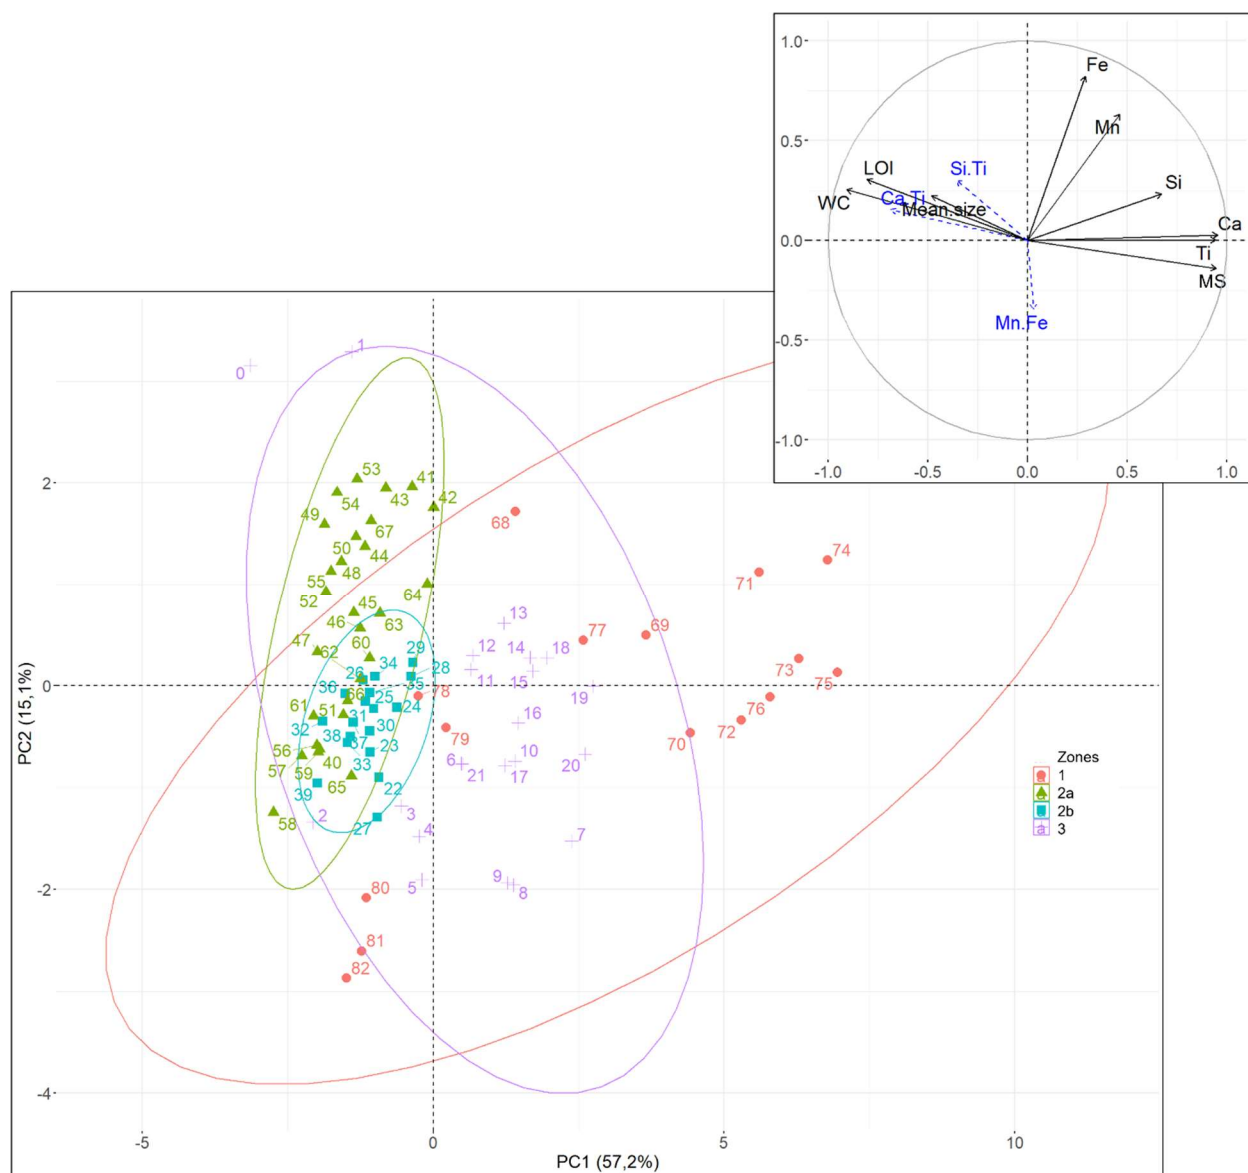

**Figure S1:** Two-dimensional graph (biplot) representing the ordination of sites (sample depths) according to the principal component analysis (axes 1 and 2) performed on the standardized physico-chemical variables measured on Oakes Bay West Lake sediment core. The samples are separated according to the zones (CONISS) previously identified with confidence ellipses (95%). The circle of radius 1 represents the maximum contribution of a vector and blue arrows represent ratios that were included as supplementary variables. Abbreviations: LOI – Loss on ignition (organic matter), WC - Water Content, MS - Magnetic Susceptibility.

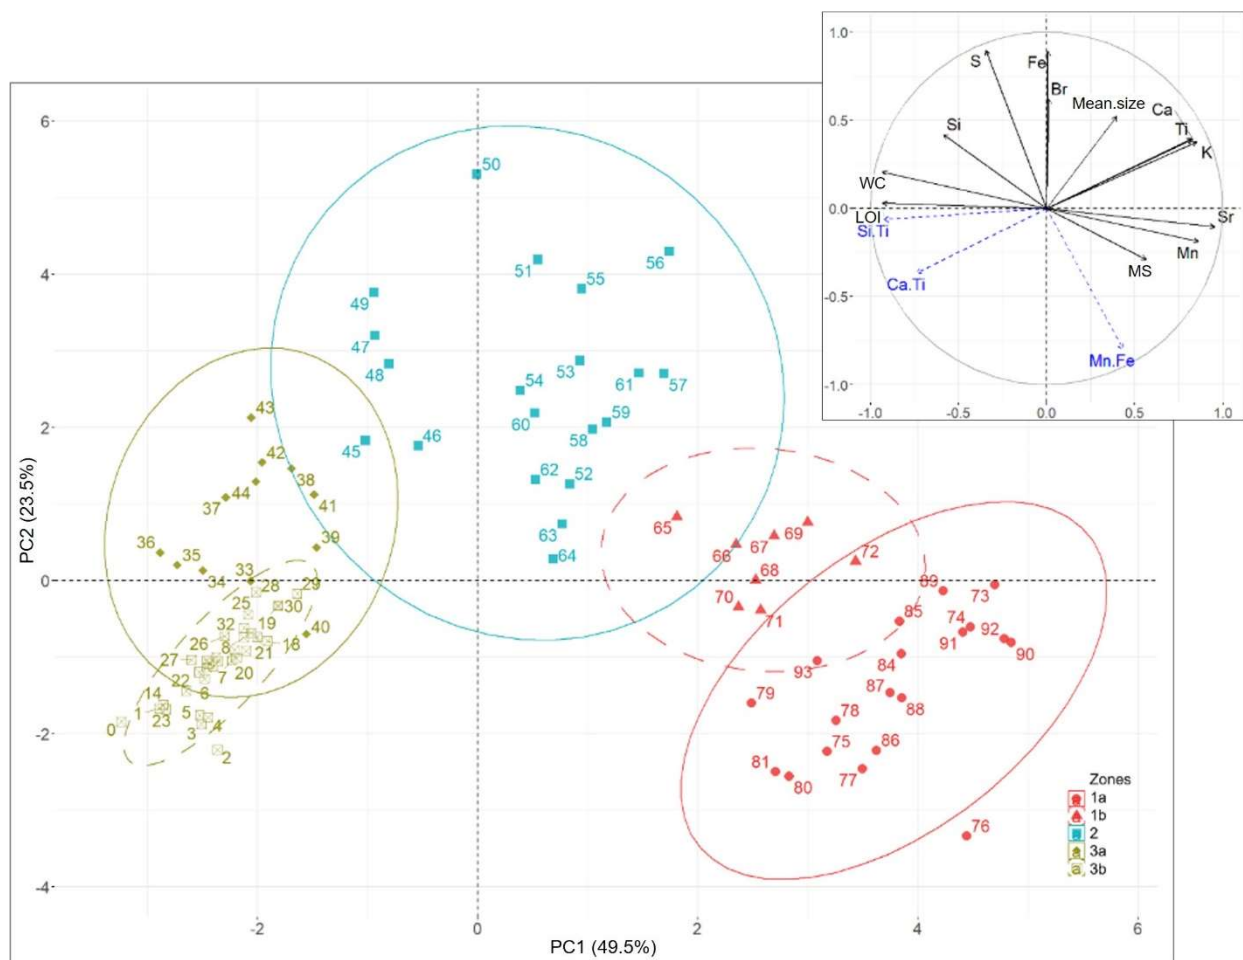

**Figure S2:** Two-dimensional graph (biplot) representing the ordination of sites (sample depths) according to the principal component analysis (axes 1 and 2) performed on the standardized physico-chemical variables measured on Evilik Lake sediment core. The samples are separated according to the zones (CONISS) previously identified with confidence ellipses (95%). The circle of radius 1 represents the maximum contribution of a vector and blue arrows represent ratios that were included as supplementary variables. Abbreviations: LOI – Loss on ignition (organic matter), WC - Water Content, MS - Magnetic Susceptibility.
